# Supplementary material for: Identification of lead inhibitors for 3CLpro of SARS-CoV-2 target using machine learning based virtual screening, ADMET analysis, molecular docking and molecular dynamics simulations
Source: Royal Society of Chemistry journal article supplement (doi:10.1039/d4ra04502e), 2024-01-01
Supplement: d4ra04502e1.pdf [file d4ra04502e1.pdf]

## Supplementary Information

# IDENTIFICATION OF LEAD INHIBITORS FOR 3CLPRO OF SARS-COV-2 TARGET USING MACHINE LEARNING BASED VIRTUAL SCREENING, ADMET ANALYSIS, MOLECULAR DOCKING AND MOLECULAR DYNAMICS SIMULATIONS

Sandeep Poudel Chhetri<sup>1</sup>, Vishal Singh Bhandari<sup>2</sup>, Rajesh Maharjan<sup>1</sup>, Tika Ram Lamichhane<sup>1,\*</sup>

<sup>1</sup> Central Department of Physics, Tribhuvan University, Kathmandu 44600, Nepal

<sup>2</sup> Central Department of Chemistry, Tribhuvan University, Kathmandu 44600, Nepal

\* **Correspondence:** Email: [tika.lamichhane@cdp.tu.edu.np](mailto:tika.lamichhane@cdp.tu.edu.np)

**Figure-S1:** Molecular Structure of Azvudine, Ensitrelvir, Simnotrelvir, and Nirmatrelvir.

**Table-S1:** General performance of 20 different classifiers.

**Figure-S2:** Confusion matrix for (a) NuSVC (b) ExtraTreesClassifier (c) LGBM Classifier (d) Voting Classifier.

**Table-S2:** Physicochemical properties, pharmacokinetics, druglikeness, and medicinal chemistry of the molecules.

**Figure-S3:** Bioavailability radar diagram for Azvudine and Nirmatrelvir as references and candidates M1, M2, and M3.

**Table-S3:** General performance of 20 different regressors.

**Figure-S4:** Boiled Egg graph of known inhibitors and potential inhibitors.

**Table-S4:** Molecular docking results of three candidate compounds with 3CLpro.

**Figure-S5:** Experimental versus predicted pIC<sub>50</sub> for training and testing set.

**Table-S5:** Active residues of 3CLpro and their interaction with best docking pose of candidate compounds.

**Figure-S6:** Redocking of Z219104216 in 3CLpro.

**Table-S6:** Average binding free energies of 3CLpro-M1 complex using the MM-PBSA method (all values are in kcal/mol).

**Figure-S7:** RMSF plot for ap and M1 binding forms of 3CLpro during 200ns MD simulation.

**Table-S7:** The binding free energies contributed by active amino acid residues of 3CLpro and M1 (LIG).

**Figure-S8:** Secondary structure evaluation of apo and M1 binding forms of 3CLpro during 200ns MD simulation.

**Figure-S9:** Heatmap of the binding free energy contribution by active residues and ligand during last 20ns MD simulations.

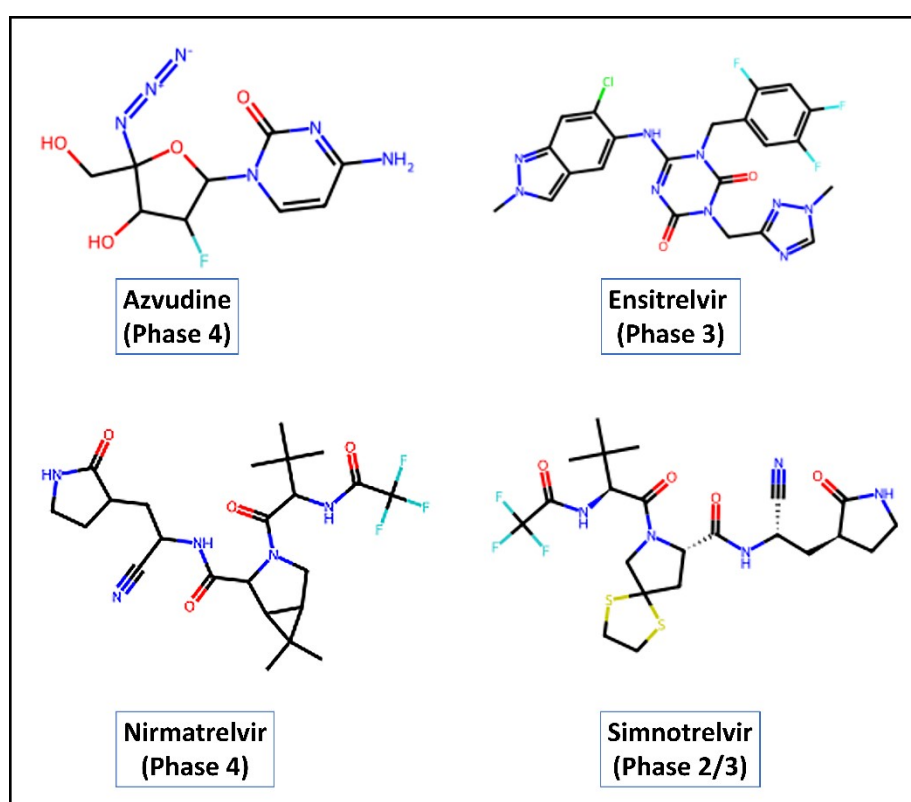

**Figure-S1:** Molecular Structure of Azvudine, Ensitrelvir, Simnotrelvir, and Nirmatrelvir.

**Table-S1:** General performance of 20 different classifiers.

| Classifiers            | Accuracy | ROC AUC |
|------------------------|----------|---------|
| NuSVC                  | 0.89     | 0.90    |
| ExtraTreesClassifier   | 0.89     | 0.89    |
| RandomForestClassifier | 0.88     | 0.88    |
| LGBMClassifier         | 0.88     | 0.88    |
| SVC                    | 0.87     | 0.88    |
| XGBClassifier          | 0.87     | 0.87    |
| BaggingClassifier      | 0.86     | 0.86    |

|                             |      |      |
|-----------------------------|------|------|
| Perceptron                  | 0.86 | 0.86 |
| DecisionTreeClassifier      | 0.86 | 0.86 |
| ExtraTreeClassifier         | 0.85 | 0.85 |
| CalibratedClassifierCV      | 0.84 | 0.84 |
| Logisticregression          | 0.84 | 0.84 |
| PassiveAggressiveClassifier | 0.84 | 0.84 |
| AdaBoostClassifier          | 0.83 | 0.83 |
| SGDClassifier               | 0.83 | 0.83 |
| LinearDiscriminantanalysis  | 0.82 | 0.82 |
| RidgeClassifier             | 0.82 | 0.82 |
| LinearSVC                   | 0.82 | 0.82 |
| BernoulliNB                 | 0.81 | 0.81 |
| KNeighboursClassifier       | 0.82 | 0.81 |

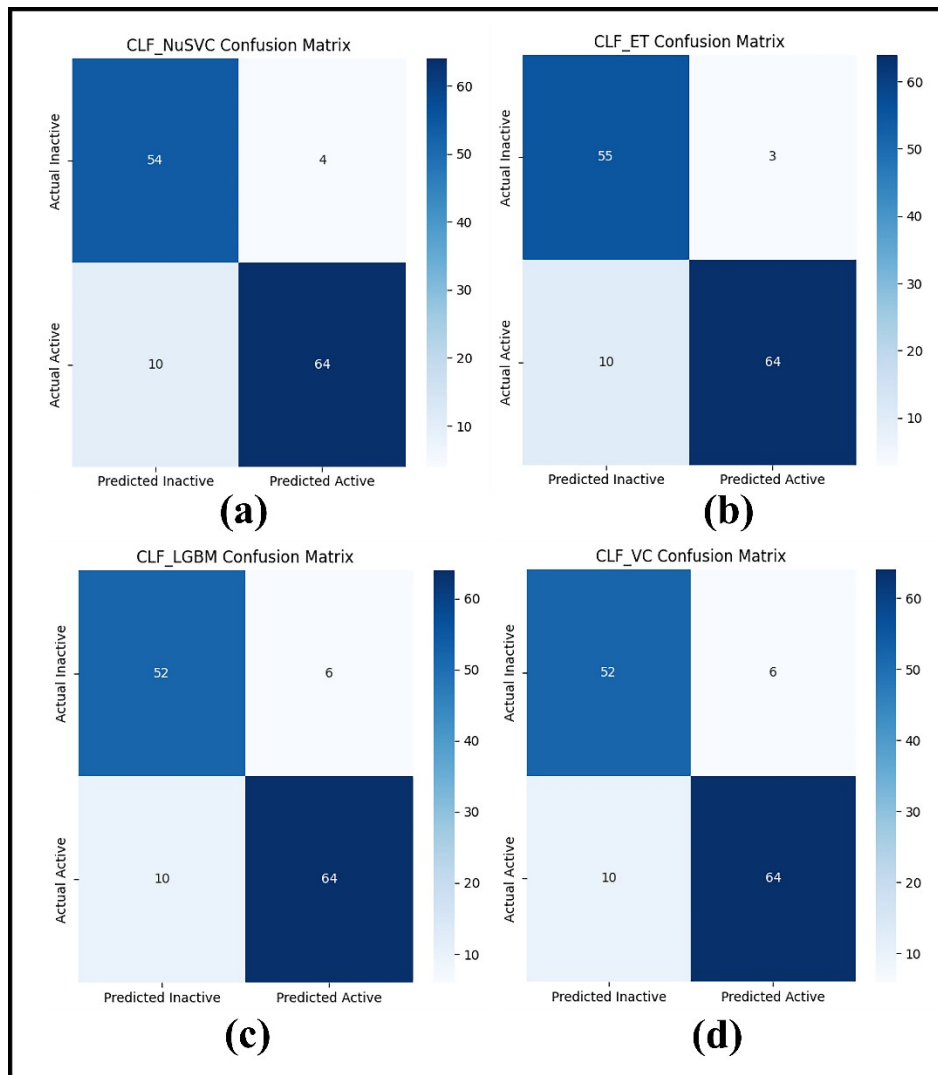

**Figure-S2:** Confusion matrix for (a) NuSVC (b) ExtraTreesClassifier (c) LGBM Classifier (d) Voting Classifier.

**Table-S2:** Physicochemical properties, pharmacokinetics, druglikeness, and medicinal chemistry of the molecules.

| Compound     | Physiochemical Properties |        | Pharmacokinetics          |       | Druglikeness          |                  |
|--------------|---------------------------|--------|---------------------------|-------|-----------------------|------------------|
| Azvudine     | Molecular weight (g/mol)  | 286.22 | GI absorption             | Low   | Lipinski              | Yes;0 violations |
|              | Num. heavy atoms          | 20     | BBB period                | No    | Ghose                 | No;1             |
|              | Num. arom. heavy atoms    | 6      | P-gp substrate            | No    | Veber                 | No;1             |
|              | Fraction Csp3             | 0.56   | CYP1A2 inhibitor          | No    | Egan                  | No;1             |
|              | Num. rotatable bonds      | 3      | CYP2C9 inhibitor          | No    | Muegge                | No;1             |
|              | Num. H-bond acceptors     | 9      | CYP2C9 inhibitor          | No    | Bioavailability score | 0.55             |
|              | Num. H-bond donors        | 3      | CYP2D6 inhibitors         | No    |                       |                  |
|              | Molar Refractivity        | 59.60  | CYP3A4 inhibitor          | No    |                       |                  |
|              | TPSA(Å <sup>2</sup> )     | 160.35 | Log K <sub>p</sub> (cm/s) | -8.62 |                       |                  |
| Nirmatrelvir | Molecular weight (g/mol)  | 499.53 | GI absorption             | High  | Lipinski              | Yes              |
|              | Num. heavy atoms          | 35     | BBB period                | No    | Ghose                 | No;1             |
|              | Num. arom. heavy atoms    | 0      | P-gp substrate            | Yes   | Veber                 | No;1             |
|              | Fraction Csp3             | 0.78   | CYP1A2 inhibitor          | No    | Egan                  | Yes              |
|              | Num. rotatable bonds      | 11     | CYP2C9 inhibitor          | No    | Muegge                | Yes              |
|              | Num. H-bond acceptors     | 8      | CYP2C9 inhibitor          | No    | Bioavailability score | 0.55             |
|              | Num. H-bond donors        | 3      | CYP2D6 inhibitors         | No    |                       |                  |
|              | Molar Refractivity        | 125.68 | CYP3A4 inhibitor          | Yes   |                       |                  |
|              | TPSA(Å <sup>2</sup> )     | 131.40 | Log K <sub>p</sub> (cm/s) | -7.81 |                       |                  |
| M1           | Molecular weight (g/mol)  | 359.38 | GI absorption             | High  | Lipinski              | Yes              |
|              | Num. heavy atoms          | 26     | BBB period                | No    | Ghose                 | No;1             |
|              | Num. arom. heavy atoms    | 12     | P-gp substrate            | Yes   | Veber                 | Yes              |
|              | Fraction Csp3             | 0.44   | CYP1A2 inhibitor          | No    | Egan                  | Yes              |
|              | Num. rotatable bonds      | 4      | CYP2C9 inhibitor          | No    | Muegge                | Yes              |

|                       |                           |                           |                           |       |                       |      |
|-----------------------|---------------------------|---------------------------|---------------------------|-------|-----------------------|------|
|                       | Num. H-bond acceptors     | 5                         | CYP2C9 inhibitor          | No    | Bioavailability score | 0.55 |
|                       | Num. H-bond donors        | 2                         | CYP2D6 inhibitors         | No    |                       |      |
|                       | Molar Refractivity        | 100.84                    | CYP3A4 inhibitor          | No    |                       |      |
|                       | TPSA(Å <sup>2</sup> )     | 118.29                    | Log K <sub>p</sub> (cm/s) | -8.88 |                       |      |
| M2                    | Molecular weight (g/mol)  | 345.35                    | GI absorption             | High  | Lipinski              | Yes  |
|                       | Num. heavy atoms          | 25                        | BBB period                | No    | Ghose                 | Yes  |
|                       | Num. arom. heavy atoms    | 12                        | P-gp substrate            | No    | Veber                 | Yes  |
|                       | Fraction Csp <sup>3</sup> | 0.35                      | CYP1A2 inhibitor          | No    | Egan                  | Yes  |
|                       | Num. rotatable bonds      | 5                         | CYP2C9 inhibitor          | No    | Muegge                | Yes  |
|                       | Num. H-bond acceptors     | 5                         | CYP2C9 inhibitor          | No    | Bioavailability score | 0.55 |
|                       | Num. H-bond donors        | 2                         | CYP2D6 inhibitors         | No    |                       |      |
|                       | Molar Refractivity        | 94.97                     | CYP3A4 inhibitor          | No    |                       |      |
| TPSA(Å <sup>2</sup> ) | 104.49                    | Log K <sub>p</sub> (cm/s) | -8.04                     |       |                       |      |
| M3                    | Molecular weight (g/mol)  | 337.37                    | GI absorption             | High  | Lipinski              | Yes  |
|                       | Num. heavy atoms          | 24                        | BBB period                | No    | Ghose                 | No;1 |
|                       | Num. arom. heavy atoms    | 8                         | P-gp substrate            | No    | Veber                 | Yes  |
|                       | Fraction Csp <sup>3</sup> | 0.69                      | CYP1A2 inhibitor          | No    | Egan                  | Yes  |
|                       | Num. rotatable bonds      | 3                         | CYP2C9 inhibitor          | No    | Muegge                | Yes  |
|                       | Num. H-bond acceptors     | 5                         | CYP2C9 inhibitor          | No    | Bioavailability score | 0.55 |
|                       | Num. H-bond donors        | 3                         | CYP2D6 inhibitors         | No    |                       |      |
|                       | Molar Refractivity        | 90.82                     | CYP3A4 inhibitor          | No    |                       |      |
| TPSA(Å <sup>2</sup> ) | 115.49                    | Log K <sub>p</sub> (cm/s) | -8.77                     |       |                       |      |

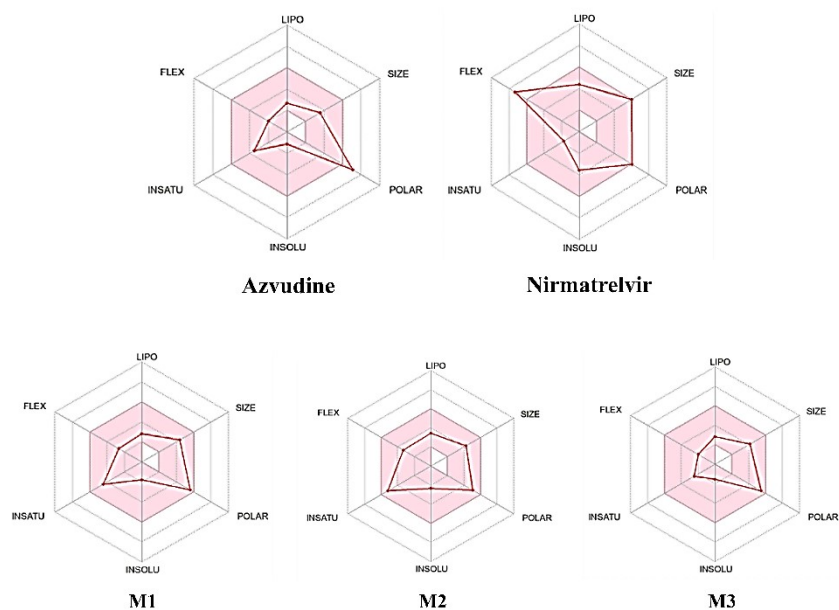

**Figure-S3:** Bioavailability radar diagram for Azvudine and Nirmatrelvir as references and candidates M1, M2, and M3.

**Table-S3:** General performance of 20 different regressors.

| Regressors                    | R-Squared | RMSE |
|-------------------------------|-----------|------|
| HistGradientBoostingRegressor | 0.70      | 0.64 |
| LGBMRegressor                 | 0.70      | 0.64 |
| TweedieRegressor              | 0.65      | 0.68 |
| GammaRegressor                | 0.65      | 0.69 |
| RandomForestRegressor         | 0.65      | 0.69 |
| BayesianRidge                 | 0.64      | 0.70 |
| GradientBoostingRegressor     | 0.63      | 0.71 |
| BaggingRegressor              | 0.62      | 0.72 |
| PoissonRegressor              | 0.62      | 0.72 |
| ElasticNetCV                  | 0.61      | 0.72 |
| LassoCV                       | 0.61      | 0.73 |
| XGBRegressor                  | 0.60      | 0.74 |
| LassoLarsCV                   | 0.59      | 0.74 |
| RidgeCV                       | 0.58      | 0.75 |
| passiveAggressiveRegressor    | 0.58      | 0.75 |
| HuberRegressor                | 0.58      | 0.75 |
| Ridge                         | 0.56      | 0.77 |

|                      |      |      |
|----------------------|------|------|
| KNeighboursRegressor | 0.54 | 0.79 |
| NuSVR                | 0.54 | 0.79 |
| SVR                  | 0.54 | 0.79 |

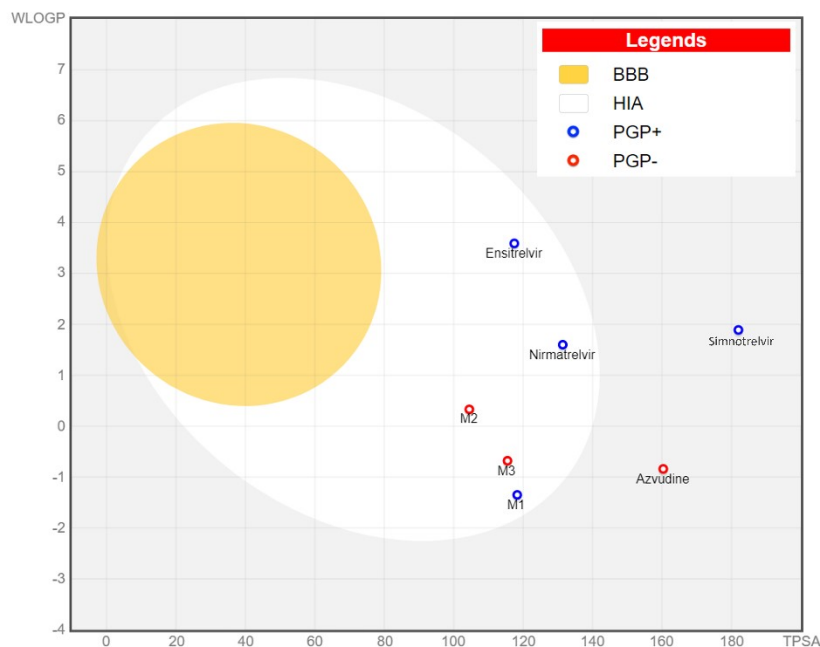

**Figure-S4:** Boiled Egg graph of known inhibitors and potential inhibitors.

**Table-S4:** Molecular docking results of three candidate compounds with 3CLpro.

| Compounds | Final intermolecular energy<br>[vdW+H-<br>bond+desolv+electrostatic<br>energy] (kcal/mol) | Final total<br>internal<br>energy<br>(kcal/mol) | Torsional<br>free<br>energy<br>(kcal/mol) | Unbound<br>system's<br>energy<br>(kcal/mol) | Estimated<br>free energy<br>of binding<br>(kcal/mol) |
|-----------|-------------------------------------------------------------------------------------------|-------------------------------------------------|-------------------------------------------|---------------------------------------------|------------------------------------------------------|
| M1        | -9.53                                                                                     | -0.37                                           | +0.89                                     | -0.37                                       | -8.64                                                |
| M2        | -9.41                                                                                     | -0.74                                           | +1.19                                     | -0.74                                       | -8.22                                                |
| M3        | -8.90                                                                                     | -0.62                                           | +0.89                                     | -0.62                                       | -8.00                                                |

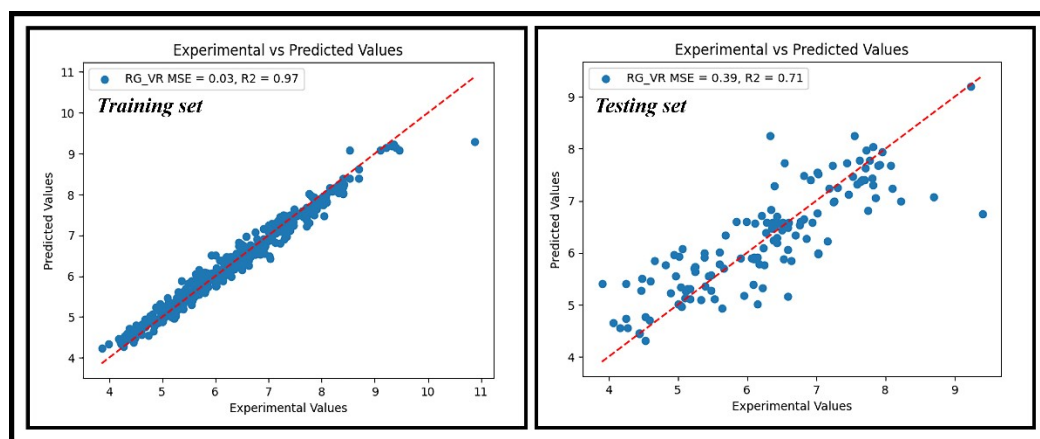

**Figure-S5:** Experimental versus predicted pIC50 for training and testing set.

**Table-S5:** Active residues of 3CLpro and their interaction with best docking pose of candidate compounds.

| Compounds | Hydrophobic Interactions | Distance (Å) | Hydrogen Bonds | Distance Donor-Acceptor (Å) | Angle (°) |
|-----------|--------------------------|--------------|----------------|-----------------------------|-----------|
| M1        | MET165                   | 3.76         | PHE140         | 2.63                        | 122.12    |
|           | GLU166                   | 3.68         | ASN142         | 2.71                        | 145.26    |
|           |                          |              | HIS163         | 2.08                        | 133.42    |
|           |                          |              | GLU166         | 3.61                        | 142.77    |
|           |                          |              | GLU166         | 2.59                        | 110.28    |
|           |                          |              | ARG188         | 3.75                        | 152.30    |
|           |                          |              | GLN189         | 4.07                        | 123.79    |
| M2        | -                        | -            | GLY143         | 2.80                        | 165.60    |
|           |                          |              | HIS163         | 3.02                        | 173.20    |
|           |                          |              | GLU166         | 3.91                        | 138.06    |
|           |                          |              | GLU166         | 2.85                        | 129.94    |
|           |                          |              | ARG188         | 3.00                        | 130.99    |
| M3        | MET165                   | 3.30         | ASN142         | 2.70                        | 147.65    |
|           | GLU166                   | 3.72         | GLY143         | 4.02                        | 151.29    |
|           |                          |              | HIS163         | 2.93                        | 135.18    |
|           |                          |              | GLU166         | 3.13                        | 123.06    |
|           |                          |              | GLN189         | 2.78                        | 102.37    |

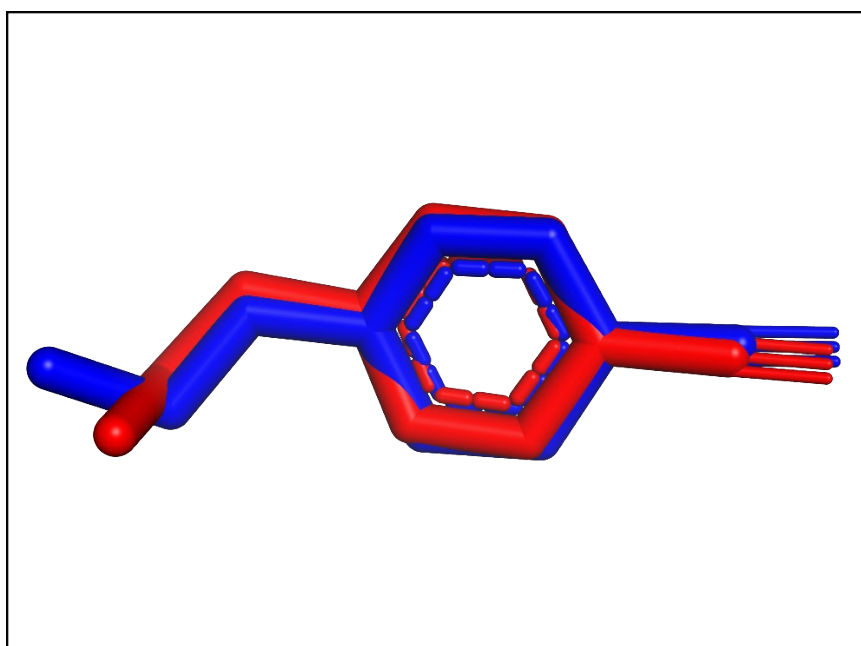

**Figure-S6:** Redocking of Z219104216 in 3CLpro. The original and redocked pose of native ligand is denoted by blue and red color respectively.



**Table-S6:** Average binding free energies of 3CLpro-M1 complex using the MM-PBSA method (all values are in kcal/mol).

| Van der Waals energy | Electrostatic energy | Polar solvation energy | Non-polar solvation energy | Total binding energy |
|----------------------|----------------------|------------------------|----------------------------|----------------------|
| $-37.85 \pm 3.24$    | $-25.86 \pm 8.88$    | $48.86 \pm 8.09$       | $-4.00 \pm 0.17$           | $-18.86 \pm 4.38$    |

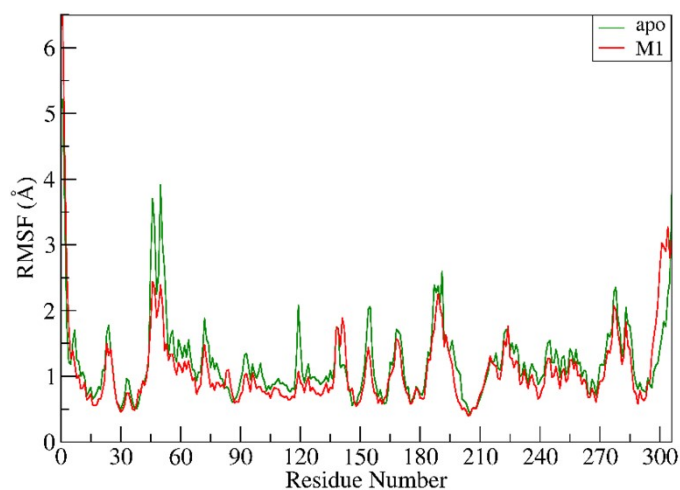

**Figure-S7:** RMSF plot for apo and M1 binding forms of 3CLpro during 200ns MD simulation.

**Table-S7:** The binding free energies contributed by active amino acid residues of 3CLpro and M1 (LIG).

| Residues | Average energy $\pm$ SD (kcal/mol) |
|----------|------------------------------------|
| HIS:41   | $-0.69 \pm 0.92$                   |
| MET:49   | $-0.59 \pm 0.35$                   |
| LEU:50   | $-0.59 \pm 0.30$                   |
| PHE:140  | $-1.19 \pm 0.52$                   |
| LEU:141  | $0.56 \pm 0.51$                    |
| ASN:142  | $-0.56 \pm 0.33$                   |
| GLY:143  | $-0.56 \pm 0.49$                   |
| SER:144  | $-1.15 \pm 0.87$                   |
| CYS:145  | $-1.7 \pm 0.54$                    |
| GLU:166  | $0.69 \pm 0.79$                    |
| LIG:307  | $-8.13 \pm 2.28$                   |

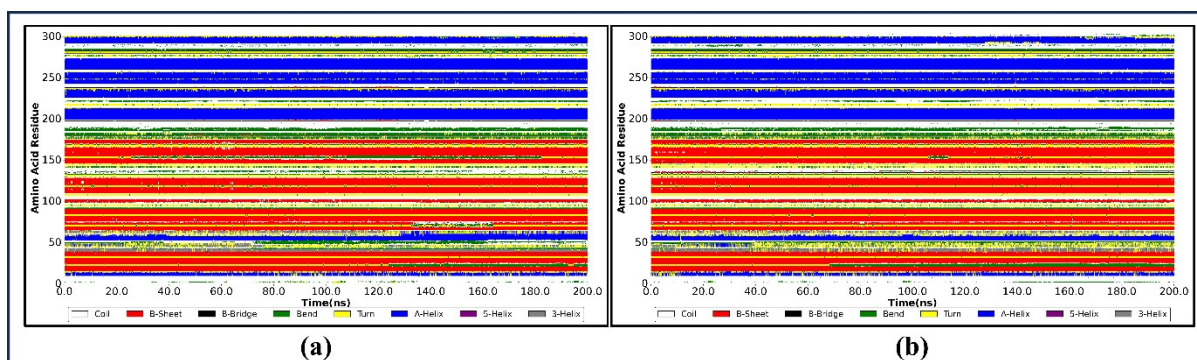

**Figure-S8:** Secondary structure evaluation of (a) apo and (b) M1 binding forms of 3CLpro during 200 ns MD simulation.

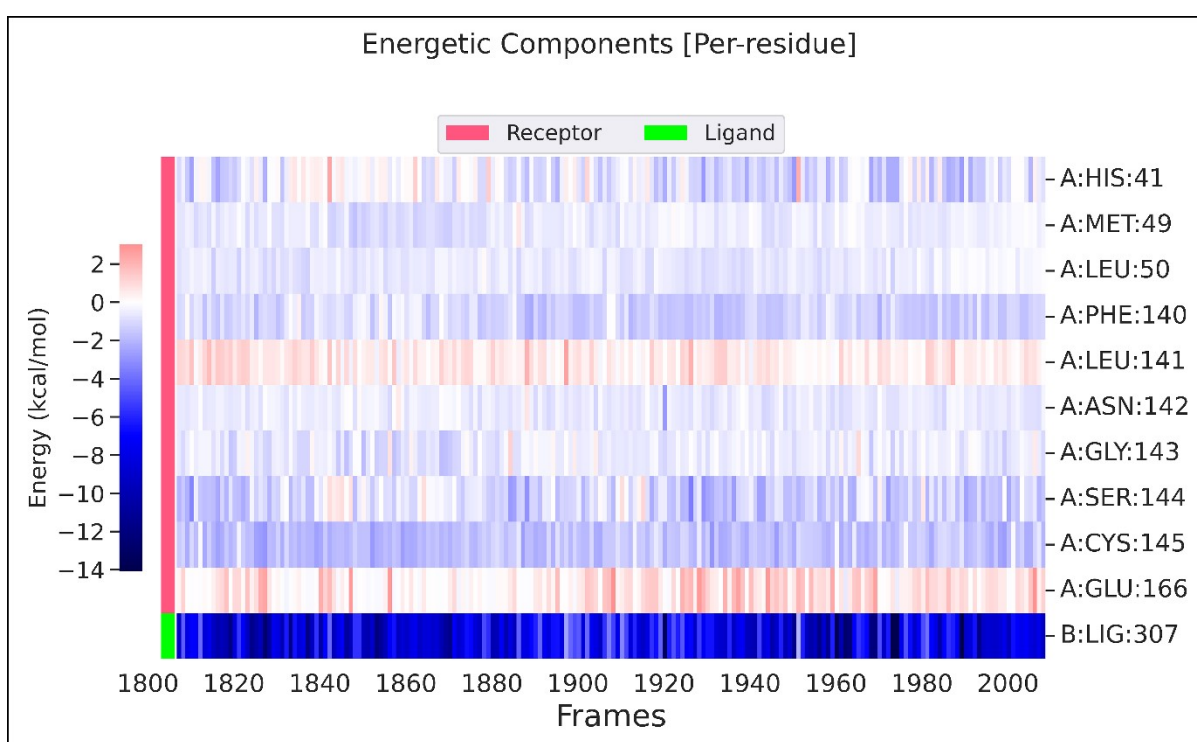

**Figure-S9:** Heatmap of the binding free energy contribution by active residues and ligand during last 20 ns MD simulations.
